# Supplementary material
Source: PubMed Central journal article supplement (PMC8211360)
Supplement: NIHMS1712475-supplement-2.pdf [file NIHMS1712475-supplement-2.pdf]

**Supplement 1.** Tangerine community health clinic:

<https://www.youtube.com/watch?v=8KjCjLGau18>

**Supplement 2.** HIV testing promotion video developed through a co-creation approach:

<https://youtu.be/WbDpNrV3avg>
